# Supplementary material for: AQP3 and AQP9—Contrary Players in Sepsis?
Source: MDPI journal article supplement (doi:10.3390/ijms25021209), 2024-01-19
Supplement: s1 [file s1]

Supplementary figures

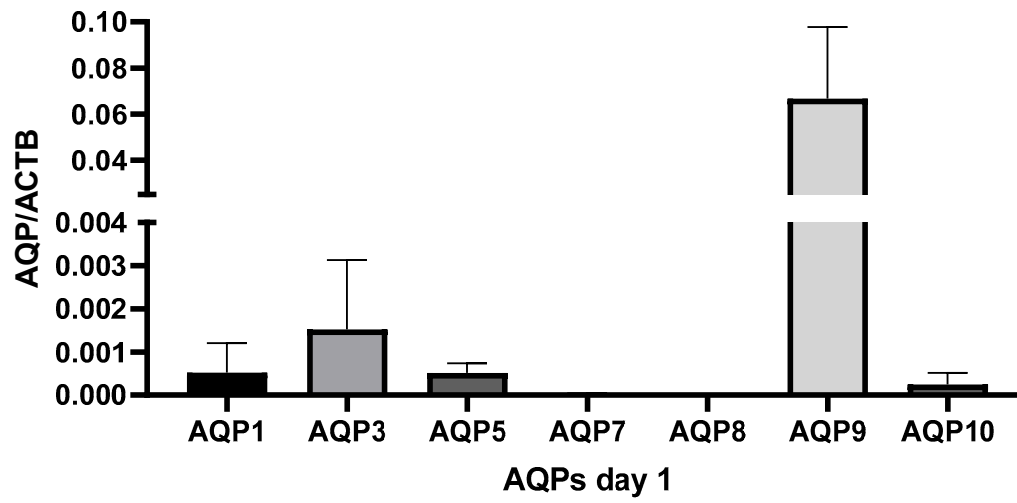

**Figure S1.** Aquaporin expression of different aquaporins in whole blood samples of septic patients. AQP expression was quantified relatively to ACTB (n = 85)

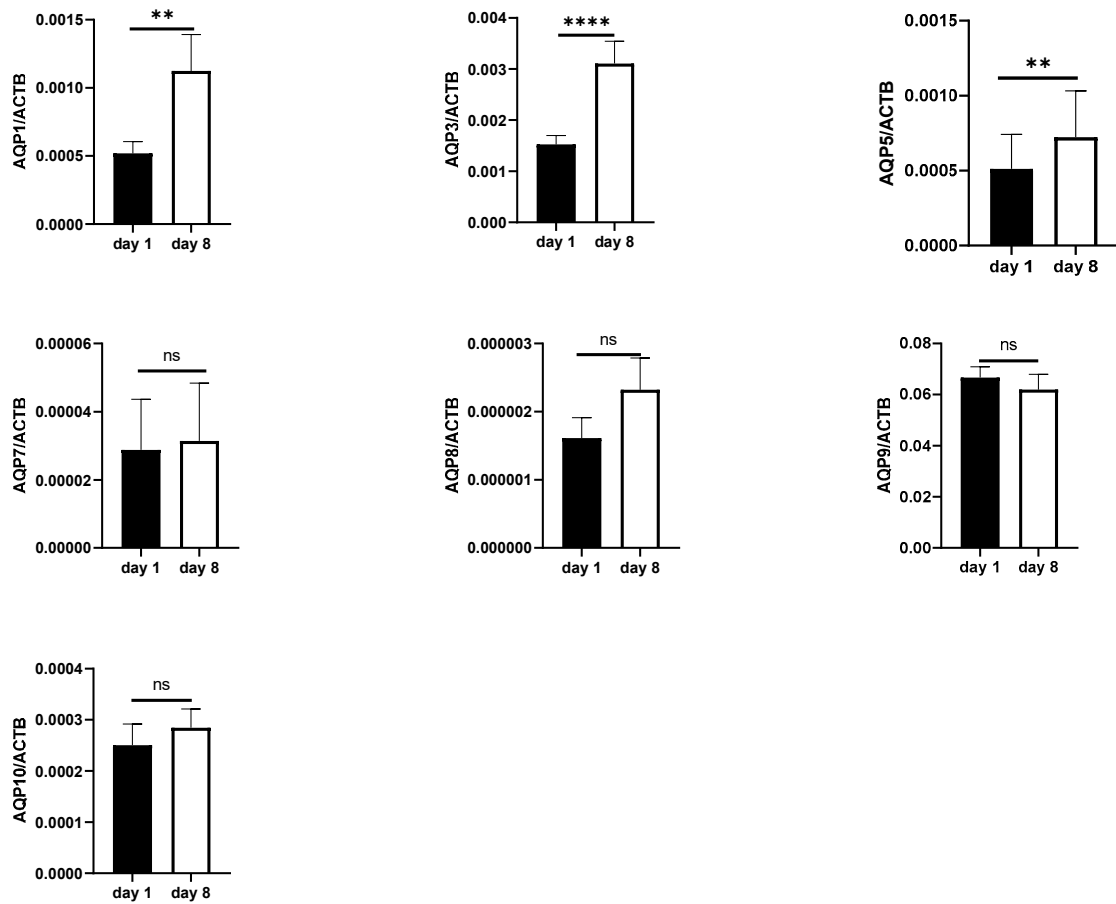

**Figure S2.** Aquaporin expression in whole blood samples of septic patients on day 1 and day 8 after sepsis diagnosis. Aquaporin expression was analyzed in the time course of sepsis. AQP1 (\*\*  $p=0.0043$ ;) and AQP3 (\*\*\*\*  $p<0.0001$ ) expression was more than doubled, when comparing day 8 with day 1. AQP5 expression was also increased (\*\*  $p=0.0022$ ). A slight increase could be detected in AQP8 expression ( $p=n.s.$ ), whereas AQP7, AQP9 and AQP10 expression was not altered in the time course of sepsis.
